# Supplementary material
Source: ML conference proceedings conference paper supplement (https://openaccess.thecvf.com/content/ICCV2025/html/Bargatin_MEMFOF_High-Resolution_Training_ICCV_2025_paper.html)
Supplement: Supplementary file 1 [file Bargatin_MEMFOF_High-Resolution_Training_ICCV_2025_supplemental.pdf]

# MEMFOF: High-Resolution Training for Memory-Efficient Multi-Frame Optical Flow Estimation

## Supplementary Material

### 7. Definitions

Here we will provide more detailed definitions used in the main text.

#### 7.1. WAUC

In optical flow, weighted area under curve (WAUC), originally from VIPER [24], is formally defined as the integral

$$\frac{2}{5} \int_0^5 f(x) \cdot \frac{5-x}{5} dx, \quad (15)$$

where  $f(x)$  is equal to the percentage of pixels where the flow error does not exceed  $x$  pixels. The metric ranges from 0 at worst to 100 at best.

#### 7.2. Mixture-of-Laplace Loss

For a single flow vector coordinate, the Mixture-of-Laplace (MoL) in SEA-RAFT is defined as:

$$\text{MixLap}(\mu_{gt}; \alpha, \beta, \mu) = -\log\left[\frac{\alpha}{2} \cdot e^{-|\mu_{gt}-\mu|} + \frac{1-\alpha}{2e^\beta} \cdot e^{-\frac{|\mu_{gt}-\mu|}{e^\beta}}\right], \quad (16)$$

where  $\mu_{gt}$  is the target flow coordinate,  $\mu$  is the predicted flow coordinate,  $\alpha$  is the predicted mixing coefficient, and  $\beta$  is the predicted scale parameter. For a single optical flow frame prediction, the MoL loss is defined as:

$$\mathcal{L}_{MoL} = \frac{1}{2HW} \sum_{u,v} \sum_{d \in \{x,y\}} \text{MixLap}(\mu_{gt}(u,v)_d; \alpha(u,v), \beta(u,v), \mu(u,v)_d). \quad (17)$$

#### 7.3. 2D Motion histogram

In order to visually demonstrate the discrepancy in motion magnitudes between common training datasets and Spring, we construct 2D histograms of motion vectors. Final results can be seen in Figure 4. The histograms are constructed in the following way:

$$H(u,v) = \sum_{n=1}^N \sum_{h=1}^H \sum_{w=1}^W [u \leq f_n(h,w,0) \leq u+1] \cdot [v \leq f_n(h,w,1) \leq v+1],$$

where  $f_n \in \mathbb{R}^{H \times W \times 2}$  is the  $n$ th flow field from a dataset,  $(u,v)$  is the motion vector ( $u \in [-H', H']$  and  $v \in$

Table 7. Performance of our main model depending on the number of iterative refinements (N). Metrics are calculated on the Spring train dataset after the TSKH stage. Speed (runtime) was measured on an Nvidia RTX 3090 GPU (24 GB).

| N  | 1px ↓        | EPE ↓        | WAUC ↑        | FI ↓         | Speed, ms |
|----|--------------|--------------|---------------|--------------|-----------|
| 0  | 6.170        | 0.893        | 90.898        | 2.625        | 71        |
| 1  | 3.752        | 0.397        | 94.731        | 1.212        | 172       |
| 2  | 3.300        | 0.350        | 95.322        | 0.979        | 215       |
| 4  | 3.133        | <b>0.339</b> | 95.565        | 0.863        | 299       |
| 6  | 3.081        | <u>0.340</u> | <u>95.603</u> | 0.835        | 385       |
| 8  | 3.061        | 0.341        | <b>95.604</b> | 0.823        | 472       |
| 10 | <u>3.050</u> | 0.342        | 95.601        | <u>0.820</u> | 557       |
| 12 | <b>3.045</b> | 0.342        | 95.598        | <b>0.819</b> | 642       |

Table 8. FullHD, method configurations taken from leaderboard submissions. Speed (runtime) was measured on an Nvidia RTX 3090 GPU (24 GB).

| Method        | Standard corr. |      | Alt. corr. |      |
|---------------|----------------|------|------------|------|
|               | GB             | ms   | GB         | ms   |
| RAFT          | 7.97           | 557  | 1.32       | 1302 |
| VideoFlow-BOF | 17.74          | 1648 | 7.41       | 3275 |
| MEMFOF        | 2.09           | 472  | 1.52       | 1235 |

$[-W', W']$ ) and  $[\cdot]$  is the Iverson bracket. We set  $H' = 1080$ ,  $W' = 1920$ , therefore our final histograms all have the same  $2160 \times 3840$  resolution, for illustration purposes, we take the logarithm of bin counts. Maximum motion boundaries are derived as twice the size of images in the dataset, since the largest motion possible is to move diagonally from one corner of an image to the other one.

### 8. Additional ablations

In this section, we provide ablations or ablation data not included in the main text.

#### 8.1. Number of iterative refinements

We study our method’s behavior depending on the number of iterative refinements. The results are provided in Table 7. For a balance between speed and accuracy, we choose to perform 8 iterative refinements.

Table 9. Full correlation volume and number of frames ablation table.

| Corr. scale | #Frames | $D_c$ | GMA | 1px ↓        |              |               |               | EPE ↓        | WAUC ↑        | Fl ↓         | Memory, GB |
|-------------|---------|-------|-----|--------------|--------------|---------------|---------------|--------------|---------------|--------------|------------|
|             |         |       |     | avg          | s0-10        | s10-40        | s40+          |              |               |              |            |
| 1/24        | 2       | 128   | ×   | 4.235        | 2.556        | 15.213        | 35.309        | 0.438        | 93.166        | 1.150        | 0.78       |
| 1/16        | 2       | 128   | ×   | 3.644        | 2.232        | 12.171        | 32.141        | 0.396        | 94.574        | 1.167        | 1.11       |
| 1/16        | 2       | 128   | ✓   | 3.547        | 2.132        | 12.101        | 32.025        | 0.408        | 94.617        | 1.035        | 1.29       |
| 1/16        | 2       | 256   | ×   | 3.420        | 2.072        | 11.440        | 30.941        | 0.372        | 94.761        | 1.018        | 1.12       |
| 1/16        | 2       | 512   | ×   | 3.375        | 2.047        | 11.201        | 30.614        | 0.350        | 95.130        | 0.888        | 1.30       |
| -----       |         |       |     |              |              |               |               |              |               |              |            |
| 1/24        | 3       | 512   | ✓   | 3.480        | 1.940        | 13.539        | 32.104        | 0.362        | 94.858        | 0.970        | 1.03       |
| 1/16        | 3       | 128   | ✓   | 3.560        | 2.154        | 12.176        | 31.543        | 0.380        | 94.859        | 1.094        | 1.78       |
| 1/16        | 3       | 256   | ✓   | 3.144        | <u>1.789</u> | 11.365        | 30.390        | 0.346        | 95.493        | <u>0.886</u> | 1.86       |
| 1/16        | 3       | 512   | ✓   | <b>3.061</b> | <b>1.739</b> | <u>11.156</u> | <b>29.423</b> | <u>0.341</u> | <u>95.604</u> | <b>0.823</b> | 2.09       |
| 1/16        | 3       | 512   | ×   | 3.151        | 1.833        | <b>10.988</b> | <u>30.165</u> | <b>0.332</b> | <b>95.623</b> | 0.896        | 1.82       |
| -----       |         |       |     |              |              |               |               |              |               |              |            |
| 1/24        | 5       | 512   | ✓   | 3.809        | 2.164        | 14.389        | 34.620        | 0.408        | 94.546        | 1.117        | 1.84       |

Table 10. Generalization performance of optical flow estimation on Sintel and KITTI-15 after the "Things" stage. By default, all methods are trained on (FlyingChairs +) FlyingThings3D, additional datasets are listed in the "Extra data" column.

| Extra data | Method        | Sintel (train) |             | KITTI-15 (train) |              |
|------------|---------------|----------------|-------------|------------------|--------------|
|            |               | Clean ↓        | Final ↓     | Fl-epe ↓         | Fl-all ↓     |
| TartanAir  | PWC-Net       | 2.55           | 3.93        | 10.4             | 33.7         |
|            | Flow1D        | 1.98           | 3.27        | 6.69             | 22.95        |
|            | MeFlow        | 1.49           | 2.75        | 5.31             | 16.65        |
|            | RAFT          | 1.43           | 2.71        | 5.04             | 17.40        |
|            | SEA-RAFT (S)  | 1.27           | 3.74        | 4.43             | 15.1         |
|            | SEA-RAFT (M)  | 1.21           | 4.04        | 4.29             | 14.2         |
|            | SEA-RAFT (L)  | 1.19           | 4.11        | 3.62             | 12.9         |
|            | -----         |                |             |                  |              |
| TartanAir  | MemFlow       | 0.93           | <u>2.08</u> | 3.88             | 13.7         |
|            | MemFlow-T     | <b>0.85</b>    | <b>2.06</b> | 3.38             | 12.8         |
|            | VideoFlow-BOF | 1.03           | 2.19        | 3.96             | 15.3         |
|            | VideoFlow-MOF | 1.18           | 2.56        | 3.89             | 14.2         |
|            | StreamFlow    | <u>0.87</u>    | 2.11        | 3.85             | 12.6         |
|            | MEMFOF (ours) | 1.10           | 2.70        | <u>3.31</u>      | <u>10.08</u> |
|            | MEMFOF (ours) | 1.20           | 3.91        | <b>2.93</b>      | <b>9.93</b>  |
|            | -----         |                |             |                  |              |
|            |               |                |             |                  |              |
|            |               |                |             |                  |              |

## 8.2. Alternative correlation implementation

We additionally provide memory consumption and speed measurements for RAFT, VideoFlow and our method in Tab. 8 when using alternative correlation volume implementation that trades compute time for memory efficiency.

## 8.3. Corr. volume resolution and number of frames

We provide the full version of Table 5 with additional metrics as Table 9.

## 9. Additional results

In this section, we provide some other results that are not included in the main text.

### 9.1. Additional zero-shot evaluation

Following previous works, we evaluate the zero-shot performance of our method after the "Things" training stage on Sintel (train) and KITTI (train). The results are provided in Table 10. Our method has the best zero-shot evaluation on KITTI and outperforms SEA-RAFT (L) on Sintel when trained on the same datasets.

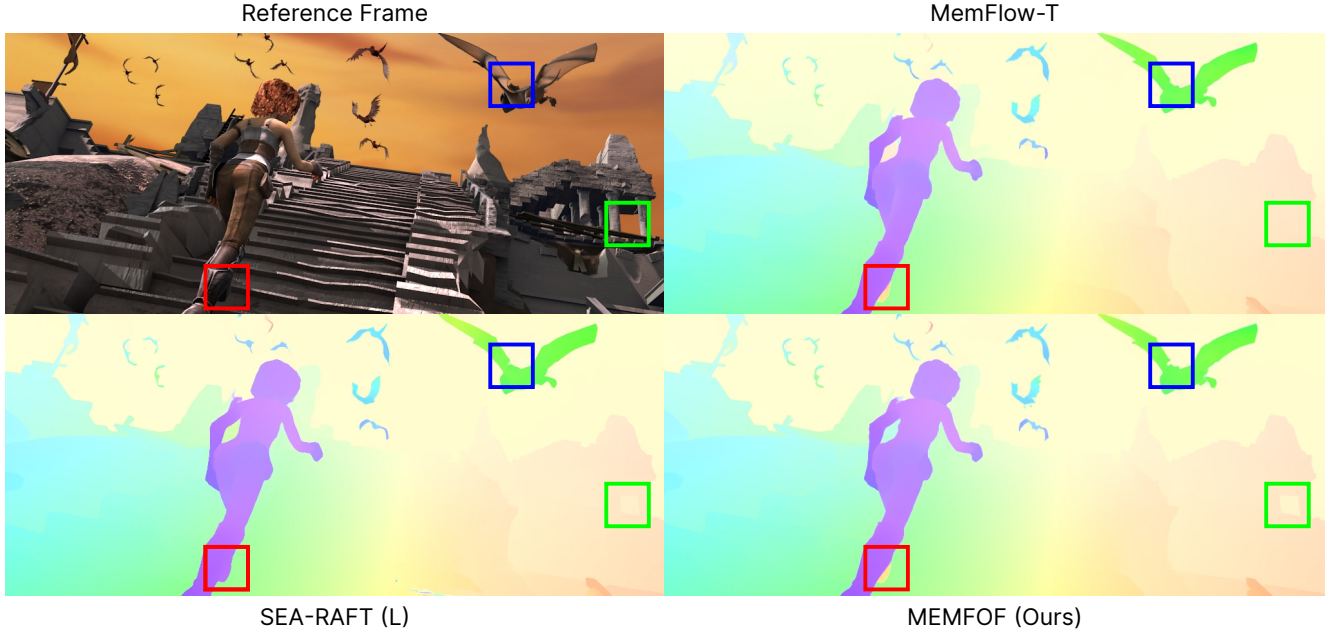

Figure 5. Qualitative comparison of MemFlow-T, SEA-RAFT (L), and our method on the Sintel benchmark. Sourced from official leaderboard submissions.

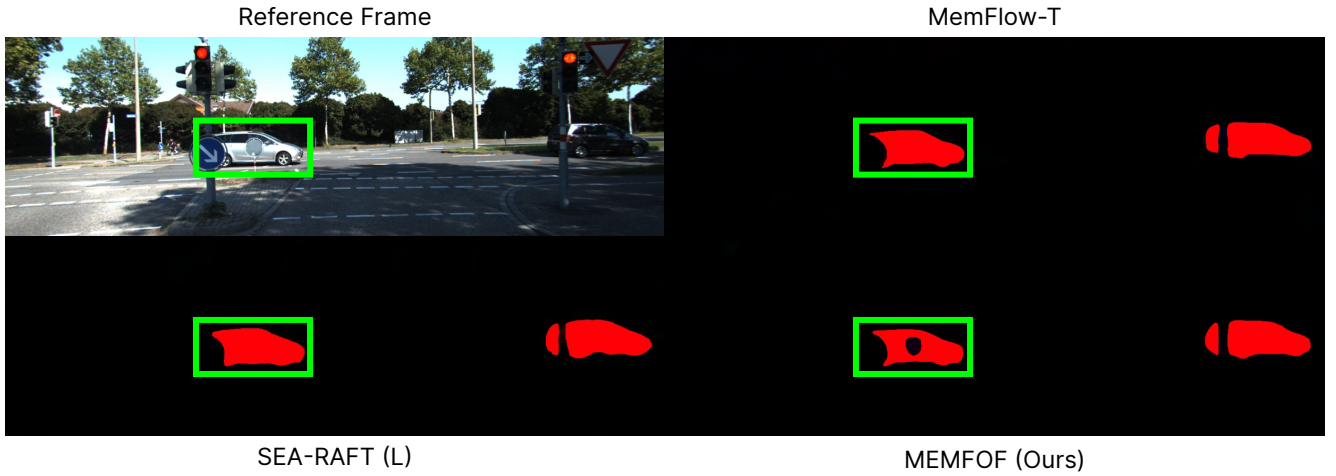

Figure 6. Qualitative comparison of MemFlow-T, SEA-RAFT (L), and our method on the KITTI-2015 benchmark. Sourced from official leaderboard submissions.

## 9.2. Qualitative comparison on Sintel and KITTI

We provide qualitative comparisons of our method on the Sintel and KITTI public benchmarks. As Figure 5 and Fig-

ure 6 show, our method has higher motion detail and coherence than our baseline or competitor.
